# Supplementary material for: Arf1-PI4KIIIβ positive vesicles regulate PI(3)P signaling to facilitate lysosomal tubule fission
Source: PubMed Central journal article supplement — J Cell Biol. 2023 Jun 8;222(9):e202205128. doi: 10.1083/jcb.202205128 (PMC10250553; doi:10.1083/jcb.202205128), 2023-06-08
Supplement: JCB_202205128_SourceDataFS3.pdf [file JCB_202205128_SourceDataFS3.pdf]

SourceDataFS3

Rabbit anti-LC3B (Novus biologicals, NB100-2220, dilution: 1:1000)

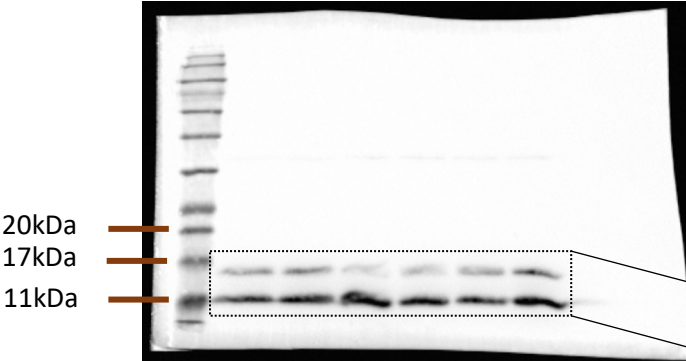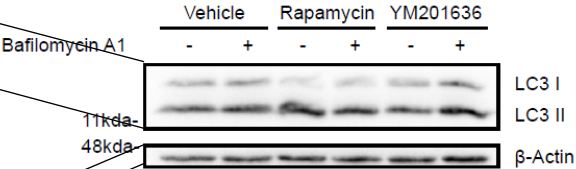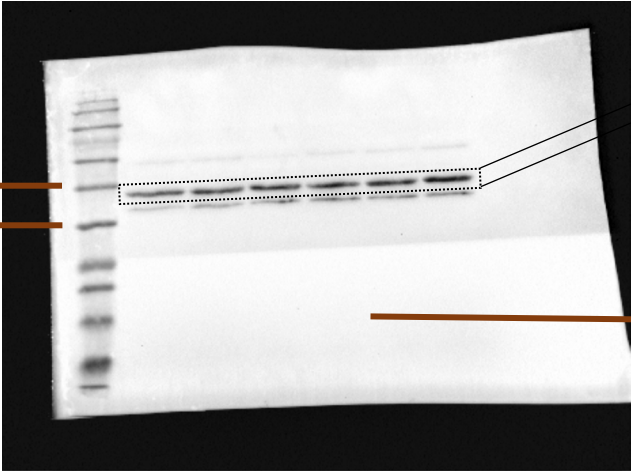

A white paper was placed in front of the bottom of the membrane to mask signal from LC3 I and II bands (shown above)

Rabbit anti- $\beta$ -Actin HRP conjugated (Cell signaling, 5125, dilution 1:10 000)
